# Supplementary material for: Effective Heat Transfer Pathways of Thermally Conductive Networks Formed by One-Dimensional Carbon Materials with Different Sizes
Source: PubMed Central journal article supplement (PMC6835844; doi:10.3390/polym11101661), 2019-10-11
Supplement: polymers-11-01661-s001.pdf [file polymers-11-01661-s001.pdf]

# Effective Heat Transfer Pathways of Thermally Conductive Networks Formed by One-Dimensional Carbon Materials with Different Sizes

Yun Seon Lee<sup>1,2,†</sup>, Seung-Yong Lee<sup>1,3,†</sup>, Keun Soo Kim<sup>4</sup>, Suguru Noda<sup>5</sup>, Sang Eun Shim<sup>2,\*</sup>,  
Cheol-Min Yang<sup>1,\*</sup>

<sup>1</sup> Institute of Advanced Composite Materials, Korea Institute of Science and Technology (KIST), 92 Chudong-ro, Wanju-gun, Jeonbuk 55324, Republic of Korea; t14225@kist.re.kr (Y.S.L.); seungyong@lginnotek.com (S.-Y. L.)

<sup>2</sup> Department of Chemical Engineering, Inha University, 100 Inha-ro, Nam-gu, Incheon 22212, Republic of Korea

<sup>3</sup> Magok R&D, LG Innotek, 30 Magokjungang 10-ro, Gangseo-gu, Seoul 07796, Republic of Korea

<sup>4</sup> Department of Physics and Graphene Research Institute, Sejong University, 209 Neungdong-ro, Gwangjin-gu, Seoul 05006, Republic of Korea; kskim2676@sejong.ac.kr

<sup>5</sup> Department of Applied Chemistry, School of Advanced Science and Engineering, Waseda University, 3-4-1 Okubo, Shinjuku-ku, Tokyo 169-8555, Japan; noda@waseda.jp

\* Correspondence: seshim@inha.ac.kr (S.E.S.); cmyang1119@kist.re.kr (C.-M. Y.)

† These authors contributed equally to this work and should be considered co-first authors.

**Table S1.** Summary of the detailed preparation conditions and thermal conductivity values of carbon-based films prepared in this study.

| Sample | FWCNT content (wt%) | MPCF content (wt%)      | Ag content (mg) | Sonication time (h) | Heat treatment (1000 °C) | Thickness ( $\mu\text{m}$ ) | Bulk density ( $\text{kg}/\text{m}^3$ ) | Thermal conductivity ( $\text{W}/\text{mK}$ ) |
|--------|---------------------|-------------------------|-----------------|---------------------|--------------------------|-----------------------------|-----------------------------------------|-----------------------------------------------|
| 1      | 100                 | -                       | -               | 0.5                 | X                        | 248                         | 210                                     | 1.65                                          |
| 2      | 100                 | -                       | -               | 2                   | X                        | 228                         | 286                                     | 2.70                                          |
| 3      | 100                 | -                       | -               | 4                   | X                        | 135                         | 316                                     | 4.02                                          |
| 4      | 100                 | -                       | -               | 8                   | X                        | 138                         | 360                                     | 4.71                                          |
| 5      | 80                  | 20 (200 $\mu\text{m}$ ) | -               | 0.5                 | X                        | 236                         | 220                                     | 2.30                                          |
| 6      | 60                  | 40 (200 $\mu\text{m}$ ) | -               | 0.5                 | X                        | 182                         | 280                                     | 3.29                                          |
| 7      | 40                  | 60 (200 $\mu\text{m}$ ) | -               | 0.5                 | X                        | 166                         | 360                                     | 4.91                                          |
| 8      | 20                  | 80 (200 $\mu\text{m}$ ) | -               | 0.5                 | X                        | 149                         | 350                                     | 4.63                                          |
| 9      | 10                  | 90 (200 $\mu\text{m}$ ) | -               | 0.5                 | X                        | 173                         | 300                                     | 4.22                                          |
| 10     | 5                   | 95 (200 $\mu\text{m}$ ) | -               | 0.5                 | X                        | 179                         | 290                                     | 3.60                                          |
| 11     | 100                 | -                       | -               | 4                   | O                        | 145                         | 305                                     | 4.80                                          |
| 12     | 100                 | -                       | -               | 0.5                 | O                        | 250                         | 200                                     | 2.02                                          |
| 13     | 80                  | 20 (200 $\mu\text{m}$ ) | -               | 0.5                 | O                        | 229                         | 213                                     | 2.71                                          |
| 14     | 60                  | 40 (200 $\mu\text{m}$ ) | -               | 0.5                 | O                        | 190                         | 272                                     | 4.02                                          |
| 15     | 40                  | 60 (200 $\mu\text{m}$ ) | -               | 0.5                 | O                        | 161                         | 327                                     | 5.41                                          |
| 16     | 20                  | 80 (200 $\mu\text{m}$ ) | -               | 0.5                 | O                        | 150                         | 298                                     | 4.84                                          |
| 17     | 10                  | 90 (200 $\mu\text{m}$ ) | -               | 0.5                 | O                        | 158                         | 289                                     | 4.25                                          |
| 18     | 5                   | 95 (200 $\mu\text{m}$ ) | -               | 0.5                 | O                        | 134                         | 322                                     | 3.65                                          |
| 19     | 40                  | 60 (6 mm)               | -               | 0.5                 | X                        | 185                         | 274                                     | 10.7                                          |
| 20     | 40                  | 60 (6 mm)               | 5               | 0.5                 | X                        | 197                         | 234                                     | 14.9                                          |
| 21     | 40                  | 60 (6 mm)               | 10              | 0.5                 | X                        | 188                         | 333                                     | 21.0                                          |
| 22     | 40                  | 60 (6 mm)               | 15              | 0.5                 | X                        | 200                         | 310                                     | 23.7                                          |
| 23     | 40                  | 60 (6 mm)               | 20              | 0.5                 | X                        | 270                         | 316                                     | 25.1                                          |
| 24     | 40                  | 60 (6 mm)               | 25              | 0.5                 | X                        | 249                         | 343                                     | 25.8                                          |

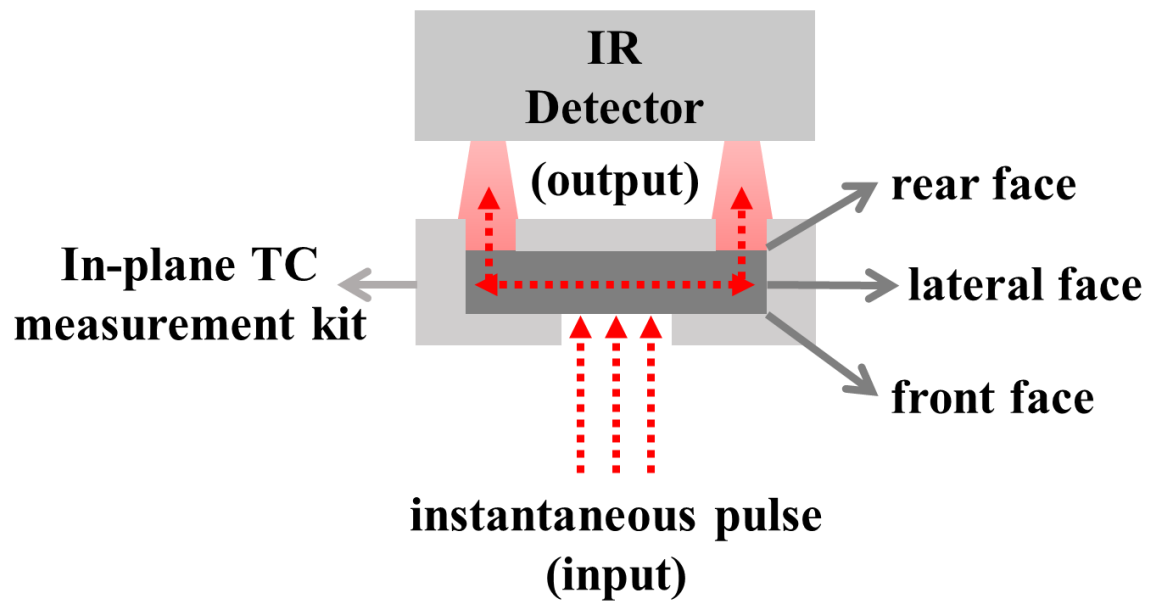

**Figure S1.** Schematic of the thermal conductivity measurement system using the modified laser flash technique.

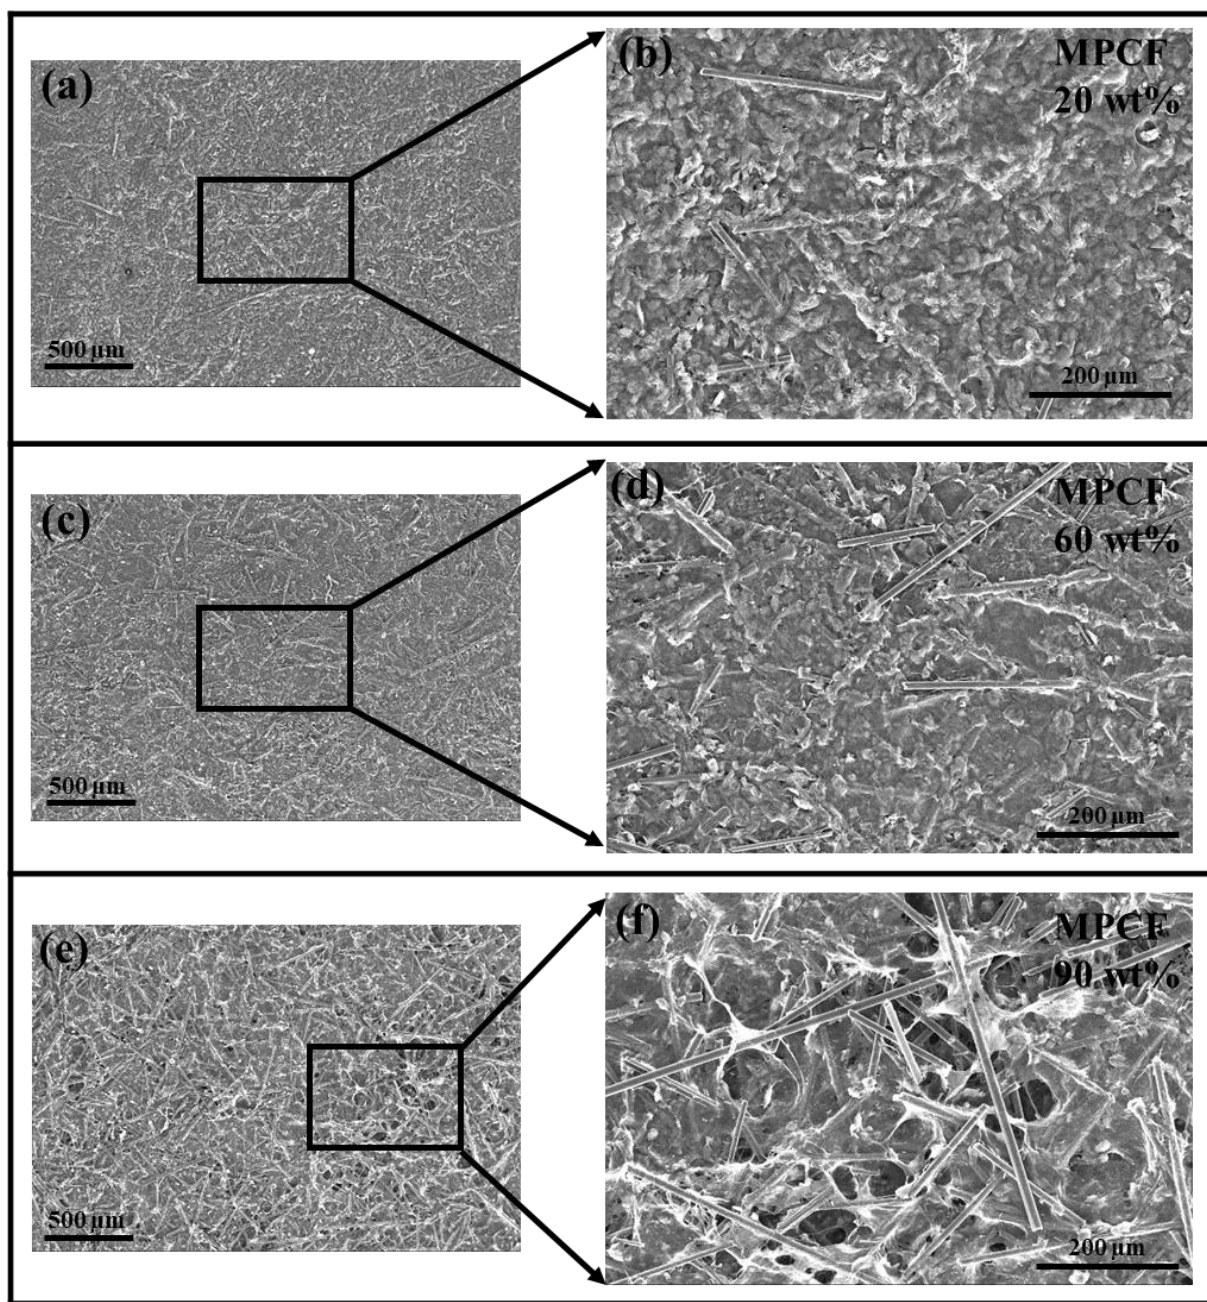

**Figure S2.** HR-SEM images of the FWCNT-MPCF hybrid films with different MPCF (length: 200 μm) contents: (a) and (b) 20 wt%, (c) and (d) 60 wt%, and (e) and (f) 90 wt%. (a), (c), and (e) are low-magnification images, while (b), (d), and (f) are high-magnification images.

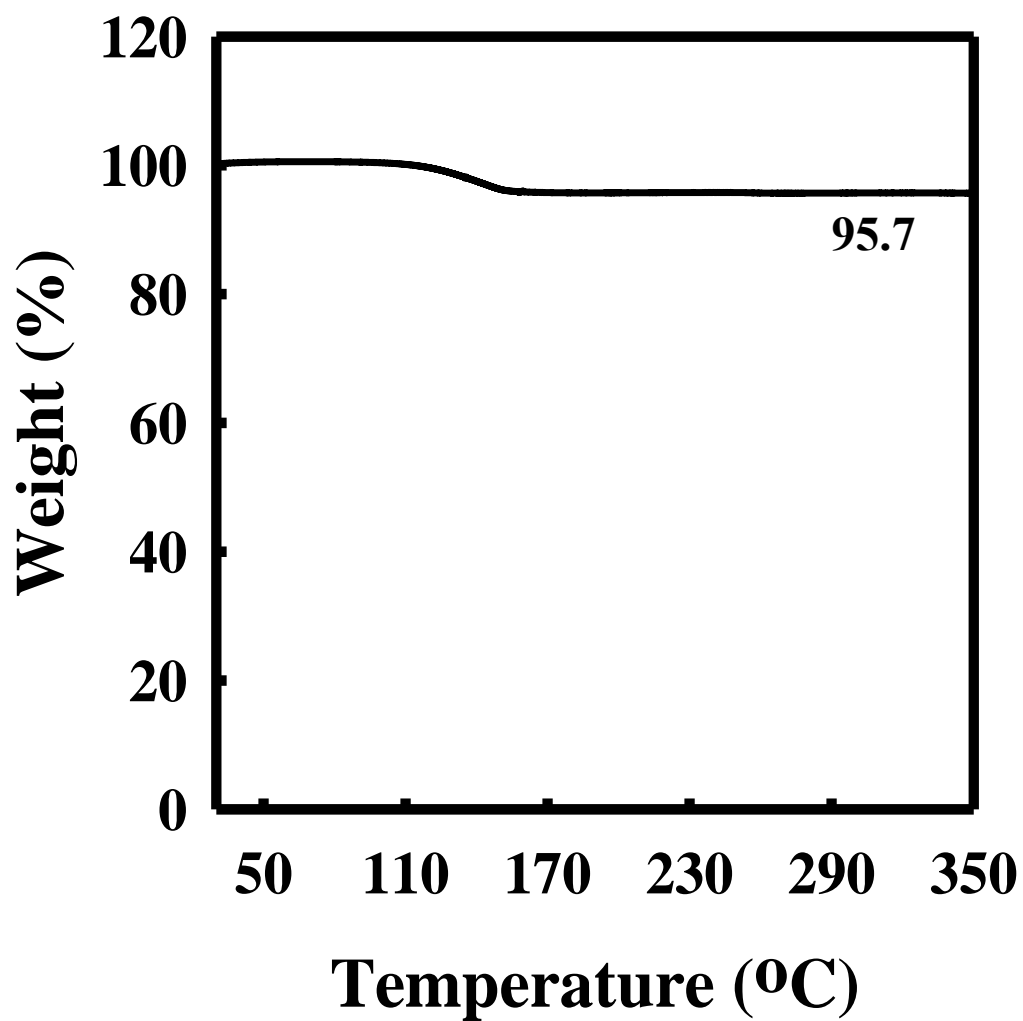

**Figure S3.** TGA curve of Ag nanoparticles under air atmosphere to 350 °C (heating rate of 10°C min<sup>-1</sup>).

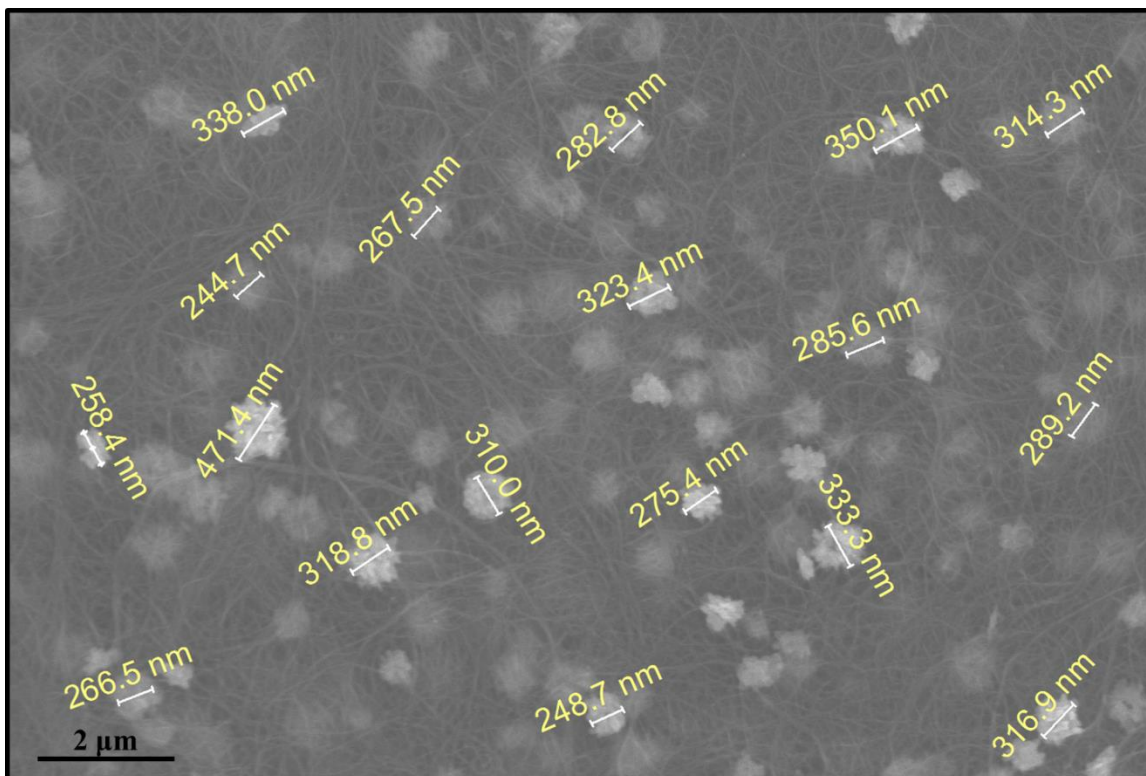

**Figure S4.** Measurement of the Ag nanoparticle sizes using HR-SEM image of the FWCNT-MPCF-Ag hybrid film incorporated with Ag content of 20 mg (MPCF length: 6 mm; MPCF content: 60 wt%; ultrasonication for 0.5 h).
